# Supplementary material for: Influence of Surface-Modified Montmorillonite Clays on the Properties of Elastomeric Thin Layer Nanocomposites
Source: MDPI journal article supplement (doi:10.3390/ma16041703), 2023-02-17
Supplement: s1 [file s1]

Supplementary data

# Influence of Surface Modified Montmorillonite Clays on the Properties of Elastomeric Thin Layer Nanocomposites

Adam Olszewski <sup>1,\*</sup>, Aleksandra Ławniczak <sup>1</sup>, Paulina Kosmela <sup>1</sup>, Marcin Strąkowski <sup>2</sup>, Aleksandra Mielewczyk-Gryń <sup>3</sup>, Aleksander Hejna <sup>4</sup>, Łukasz Piszczczyk <sup>1</sup>

<sup>1</sup> Department of Polymer Technology, Chemical Faculty, G. Narutowicza St. 11/12, Gdansk University of Technology, 80-233 Gdansk, Poland; adam.olszewski@pg.edu.pl (A.O.), lawniczak.contact@gmail.com (A.Ł.), paulina.kosmela@pg.edu.pl (P.K.), lukasz.piszczczyk@pg.edu.pl (Ł.P.)

<sup>2</sup> Department of Metrology and Optoelectronics, Faculty of Electronics, Telecommunications and Informatics, Gdańsk University of Technology, 11/12 G. Narutowicza Str., 80-233 Gdańsk, Poland; marcin.strakowski@pg.edu.pl (M.S.)

<sup>3</sup> Faculty of Applied Physics and Mathematics, Gdańsk University of Technology, Narutowicza 11/12, 80-233 Gdańsk, Poland; alegryn@pg.edu.pl (A.M.G.)

<sup>4</sup> Institute of Materials Technology, Poznan University of Technology, Piotrowo 3, 61-138 Poznań, Poland; aleksander.hejna@put.poznan.pl (A.H.)

\* Correspondence: adam.olszewski@pg.edu.pl

## 1. Thermogravimetric analysis of Poles 55/20

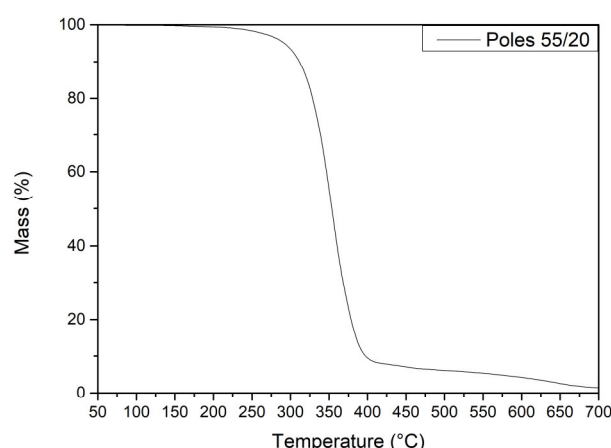

Figure S1. Thermogravimetric (TG) curve of Poles 55/20

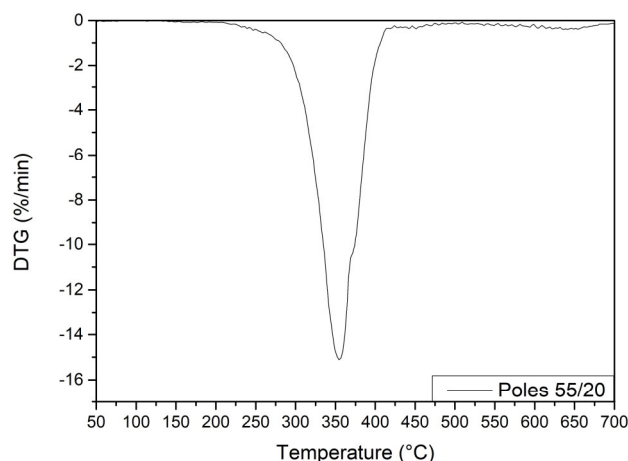

Figure S2. DTG curve of Poles 55/20

**Citation:** Olszewski, A.; Ławniczak, A.; Kosmela, P.; Strąkowski, M.; Mielewczyk-Gryń, A.; Hejna, A.; Piszczczyk, Ł. Influence of Surface-Modified Montmorillonite Clays on the Properties of Elastomeric Thin Layer Nanocomposites. *Materials* **2023**, *16*, 1703.

<https://doi.org/10.3390/ma16041703>

Academic Editors: Ivan Chodák and Hamed Peidayesh

Received: 31 December 2022

Revised: 3 February 2023

Accepted: 15 February 2023

Published: 17 February 2023

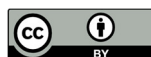

**Copyright:** © 2023 by the authors. Licensee MDPI, Basel, Switzerland. This article is an open access article distributed under the terms and conditions of the Creative Commons Attribution (CC BY) license (<https://creativecommons.org/licenses/by/4.0/>).
